# Supplementary material
Source: publisher site journal article supplement (https://www.dovepress.com/article/291807)
Supplement: Supplementary file 1 [file get_supplementary_file.php]

**Supplemental Table 1 (S1)** Demographic and Clinical Characteristics of the Moderate-to-Severe Group Compared with the Very Severe Group

| **Characteristics** | **Moderate-to-Severe**  **Group**  **（n=97）** | **Very severe**  **Group**  **（n=37）** | ***P* value** |
| --- | --- | --- | --- |
| **Biochemical indexes** |  |  |  |
| Albumin-g/L, Mean (SD) | 38.74(4.14) | 38.58(3.89) | 0.836 |
| Ca2+-mmol/L, Mean (SD) | 2.21(0.62) | 2.21(0.12) | 0.720 |
| Creatinine-mmol/L, Median (IQR) | 5.20(1.89) | 5.20(1.93) | 0.991 |
| Urea-μmol/L, Median (IQR) | 74.23(22.14) | 67.57(16.29) | 0.998 |
| Uric acid-μmol/L, Mean (SD) | 318.50(110.56) | 285.54(75.80) | 0.998 |
| Total cholestero-mmol/L, Mean (SD) | 4.67(1.05) | 4.80(1.11) | 0.522 |
| Triglyceride-mmol/L, Median (IQR) | 0.91(0.77) | 0.80(0.36) | 0.017 |
| High density lipoprotein-mmol/L, Median (IQR) | 1.37(0.38) | 1.54(0.45) | 0.025 |
| Low density lipoprotein-mmol/L, Mean (SD) | 2.81(0.86) | 2.91(1.03) | 0.574 |

**Abbreviations:** SD, standard deviation; IQR, interquartile range (25th–75th percentile).

**Supplemental Table 2 (S2)** Clinical Data of Patients with AECOPD with Normal and Abnormal Thyroid Hormone Levels

| **Characteristics** | **Normal thyroid hormone group（n=98）** | **Abnormal thyroid hormone group（n=36）** | ***P* value** |
| --- | --- | --- | --- |
| **Biochemical indexes** |  |  |  |
| Albumin-g/L, Mean (SD) | 39.15(4.00) | 37.47(4.01) | 0.033 |
| Ca2+-mmol/L, Mean (IQR) | 2.22(0.11) | 2.19(0.44) | 0.075 |
| Urea-μmol/L, Mean (SD) | 5.01(1.63) | 5.71(2.42) | 0.057 |
| Creatinine-mmol/L, Mean (SD) | 72.65(19.49) | 71.67(24.45) | 0.809 |
| Uric acid-μmol/L, Mean (SD) | 307.94(92.15) | 313.36(129.28) | 0.788 |
| Total cholestero-mmol/L, Mean (SD) | 4.60(0.90) | 5.00(1.38) | 0.052 |
| Triglyceride-mmol/L, Median (IQR) | 0.91(0.42) | 0.72(0.52) | 0.118 |
| High density lipoprotein-mmol/L, Mean (SD) | 1.38(0.36) | 1.52(0.50) | 0.081 |
| Low density lipoprotein-mmol/L, Mean (SD) | 2.78(0.80) | 3.02(1.15) | 0.175 |

**Abbreviations:** SD, standard deviation; IQR, interquartile range (25th–75th percentile).
